# Supplementary material for: Retinol-Binding Protein 4 and Visfatin Levels in Patients with Periodontitis and Obesity/Overweight: A Systematic Review and Meta-Analysis
Source: MDPI journal article supplement (doi:10.3390/cimb45120614), 2023-12-07
Supplement: s1 [file s1]

Supplementary file

# Retinol-Binding Protein 4 and Visfatin Levels in Patients with Periodontitis and Obesity/Overweight: A Systematic Review and Meta-Analysis

Yuwei Zhang <sup>1,2,†</sup>, Ru Jia <sup>1,2,†</sup>, Yifei Zhang <sup>1,2</sup>, Rui Zou <sup>1,2</sup>, Lin Niu <sup>1,2,3,\*</sup> and Shaojie Dong <sup>1,2,3,\*</sup>

1. Key Laboratory of Shaanxi Province for Craniofacial Precision Medicine Research, College of Stomatology, Xi'an Jiaotong University, Xi'an 710004, Shaanxi Province, China

2. Clinical Research Center of Shaanxi Province for Dental and Maxillofacial Diseases, Xi'an 710004, Shaanxi Province, China

3. Department of Prosthodontics, College of Stomatology, Xi'an Jiaotong University, Xi'an 710004, Shaanxi Province, China

# These authors contributed equally to this work.

\* Corresponding authors.

Lin Niu, niulin@xjtu.edu.cn; Shaojie Dong, dongshaojie@xjtu.edu.cn.

Table S1 – Inclusion and exclusion criteria and studies excluded after full-text analysis and related reasons

| Inclusion criteria                                                        | Exclusion criteria                                                                                |
|---------------------------------------------------------------------------|---------------------------------------------------------------------------------------------------|
| Randomized clinical trials;                                               | Laboratory animal science;                                                                        |
| Controlled clinical trials;                                               | Case-control studies;                                                                             |
| Reported the given cytokines/ adipocytokines levels;                      | Cross-sectional;                                                                                  |
| Published in English;                                                     | Case series;                                                                                      |
| Suitable obesity & periodontitis criterion: (Obesity: recommended by WHO; | Systematic reviews;                                                                               |
| Periodontitis: widely accepted & preferred 2017 world workshop [1] )      | Literature reviews;                                                                               |
|                                                                           | Data published as conference abstracts;                                                           |
|                                                                           | Studies without certain MD or CI data;                                                            |
|                                                                           | Clinical analysis involving periodontitis individuals with systemic conditions other than obesity |
| Study                                                                     | Reason for exclusion                                                                              |

|                                                                                                                                                                                                                                                                                                                                                                   |                                                                                                                                             |
|-------------------------------------------------------------------------------------------------------------------------------------------------------------------------------------------------------------------------------------------------------------------------------------------------------------------------------------------------------------------|---------------------------------------------------------------------------------------------------------------------------------------------|
| Raghavendra NM, Pradeep AR, Kathariya R, Sharma A, Rao NS, Naik SB. Effect of non surgical periodontal therapy on gingival crevicular fluid and serum visfatin concentration in periodontal health and disease. <i>Dis Markers</i> . 2012;32(6):383-388. doi:10.3233/DMA-2012-0897                                                                                | The study did not include individuals with obesity.                                                                                         |
| Rajasekar A. Correlation of salivary visfatin levels in obese and NON-OBESE population with periodontal status. <i>J Oral Biol Craniofac Res</i> . 2023;13(1):67-70. doi:10.1016/j.jobcr.2022.11.004                                                                                                                                                              | In this study, due to the classification, the specific statistics of visfatin levels of patients with periodontitis could not be retrieved. |
| Begum, S., B. Pratebha, J. Muthu, V. Priyadharshini, K. Vineela, and R. Saravanakumar, Correlation of Salivary Retinol Binding Protein 4 (RBP4) Levels and Periodontal Severity in Patients with Chronic Periodontitis. <i>International Journal of Life Science and Pharma Research</i> , 2022. 12: p. L128-L135. doi:10.22376/ijpbs/lpr.2022.12.6.SP25.L128-135 | The study did not include individuals with obesity.                                                                                         |
| Martinez-Herrera M, López-Domènech S, Silvestre FJ, et al. Chronic periodontitis impairs polymorphonuclear leucocyte-endothelium cell interactions and oxidative stress in humans. <i>J Clin Periodontol</i> . 2018;45(12):1429-1439. doi:10.1111/jcpe.13027                                                                                                      | In this study, the specific statistics of RBP4 levels could not be retrieved.                                                               |
| Silva-Boghossian CM, Dezone RS. What Are the Clinical and Systemic Results of Periodontitis Treatment in Obese Individuals?. <i>Curr Oral Health Rep</i> . 2021;8(3):48-65. doi:10.1007/s40496-021-00295-5                                                                                                                                                        | This article was a review.                                                                                                                  |
| Virto L, Cano P, Jiménez-Ortega V, et al. Obesity and periodontitis: An experimental study to evaluate periodontal and systemic effects of comorbidity. <i>J Periodontol</i> . 2018;89(2):176-185. doi:10.1902/jop.2017.170355                                                                                                                                    | This article was an animal experimental study.                                                                                              |
| Deschner J, Eick S, Damanaki A, Nokhbehshaim M. The role of adipokines in periodontal infection and healing. <i>Mol Oral Microbiol</i> . 2014;29(6):258-269. doi:10.1111/omi.12070                                                                                                                                                                                | This article was a review.                                                                                                                  |
| Rezaei M, Bayani M, Tasorian B, Mahdian S. The comparison of visfatin levels of gingival crevicular fluid in systemic lupus erythematosus and chronic periodontitis patients with healthy subjects. <i>Clin Rheumatol</i> . 2019;38(11):3139-3143. doi:10.1007/s10067-019-04708-w                                                                                 | The study did not include individuals with obesity.                                                                                         |
| Nogueira AV, Nokhbehshaim M, Eick S, et al. Regulation of visfatin by microbial and biomechanical signals in PDL cells. <i>Clin Oral Investig</i> . 2014;18(1):171-178. doi:10.1007/s00784-013-0935-1                                                                                                                                                             | This article was an <i>in vitro</i> experimental study.                                                                                     |
| Memmert S, Damanaki A, Nogueira AVB, et al. Regulation of tyrosine hydroxylase in periodontal fibroblasts and tissues by obesity-associated stimuli. <i>Cell Tissue Res</i> . 2019;375(3):619-628.                                                                                                                                                                | This article was an experimental study.                                                                                                     |

|                                                                                                                                                                                                                                                                         |                                                         |
|-------------------------------------------------------------------------------------------------------------------------------------------------------------------------------------------------------------------------------------------------------------------------|---------------------------------------------------------|
| Damanaki A, Memmert S, Nokhbehshaim M, et al. Impact of obesity and aging on crestal alveolar bone height in mice. <i>Ann Anat.</i> 2018;218:227-235. doi:10.1016/j.aanat.2018.04.005                                                                                   | This article was an animal experimental study.          |
| Nokhbehshaim M, Eick S, Nogueira AV, et al. Stimulation of MMP-1 and CCL2 by NAMPT in PDL cells. <i>Mediators Inflamm.</i> 2013;2013:437123. doi:10.1155/2013/437123                                                                                                    | This article was an <i>in vitro</i> experimental study. |
| Memmert S, Damanaki A, Nokhbehshaim M, et al. Regulation of somatostatin receptor 2 by proinflammatory, microbial and obesity-related signals in periodontal cells and tissues. <i>Head Face Med.</i> 2019;15(1):2. Published 2019 Jan 4. doi:10.1186/s13005-018-0185-1 | This article was an experimental study.                 |
| Nokhbehshaim M, Keser S, Jäger A, Jepsen S, Deschner J. Regulation of regenerative periodontal healing by NAMPT. <i>Mediators Inflamm.</i> 2013;2013:202530. doi:10.1155/2013/202530                                                                                    | This article was an <i>in vitro</i> experimental study. |

Table S2 - Risk of bias assessment of included studies according to the ROBINS-I tool.

|                                          | ÇETİNER et al., 2018 | Martinez-Herrera et al., 2017 |
|------------------------------------------|----------------------|-------------------------------|
| Domain 1:<br>Confounding factors         | Low                  | Low                           |
| Domain 2:<br>Selection of participants   | Moderate             | Moderate                      |
| Domain 3:<br>Intervention classification | Low                  | Low                           |
| Domain 4:<br>Deviation from intervention | Low                  | Low                           |
| Domain 5:<br>Missing data                | Low                  | Moderate                      |

|                                              |          |     |
|----------------------------------------------|----------|-----|
| Domain 6:<br>Measurement<br>of outcome       | Low      | Low |
| Domain 7:<br>Selection of<br>reported result | Moderate | Low |
| ROBINS-I<br>overall score                    | Low      | Low |

† ROBINS-I is a tool which assesses the risk of bias in non-randomized studies of interventions by looking into pre-intervention, intervention and post-intervention domains. Studies with low risk of bias (no or one moderate concern in the included domains) are comparable to randomized controlled trials. Studies with moderate risk of bias (up to four moderate concerns in the included domains) can be characterized as credible but cannot be considered comparable to a well performed randomized trial. Studies with serious risk of bias (at least one serious concern or multiple moderate concerns in the included domains) have important problems in the design. Studies with critical risk of bias (critical concerns or multiple serious concerns in the included domains) are too problematic to provide useful evidence on the intervention effect.

**Table S3- Quality assessment of incorporated studies using the Newcastle-Ottawa Scale tool.**

| Study                 | Selection | Comparability | Exposure | Score | Quality |
|-----------------------|-----------|---------------|----------|-------|---------|
| Matern et al., 2020   | ☆☆☆       | ☆             | ☆☆☆      | 7     | Good    |
| Kanoriya et al., 2016 | ☆☆☆☆      | ☆             | ☆☆☆      | 8     | Good    |
| Jia et al., 2023      | ☆☆☆       | ☆             | ☆☆☆      | 7     | Good    |
| Li et al., 2018       | ☆☆☆       | ☆             | ☆☆☆      | 7     | Good    |
| Doğan et al., 2022    | ☆☆☆       | ☆             | ☆☆☆      | 7     | Good    |

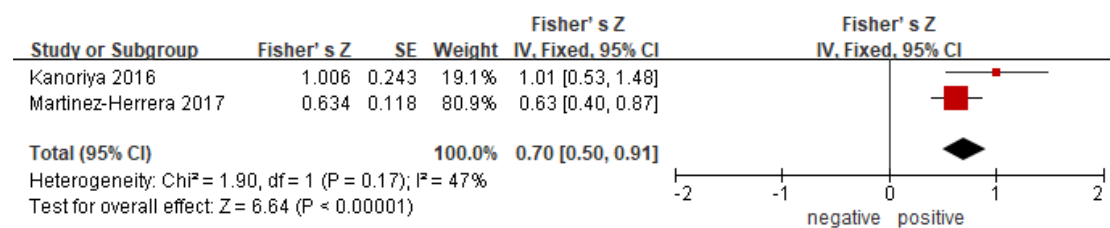

**Figure S1.** Subgroup analysis of the association of serum RBP4 levels with body mass index (BMI) in patients with obesity and periodontitis (OP). The fixed effect model and Fisher's Z with 95% CI were applied.

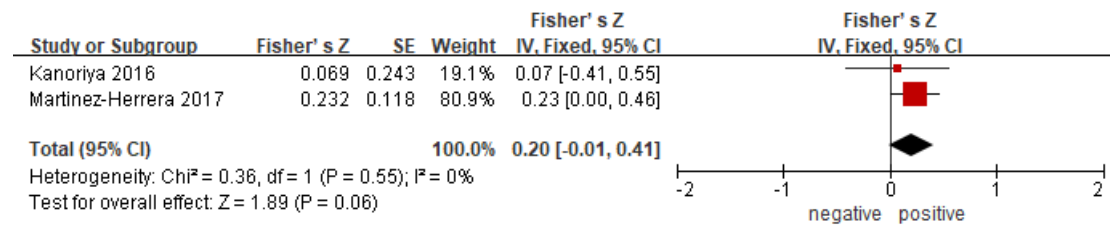

**Figure S2.** Subgroup analysis of the association of serum RBP4 levels with probing depth (PD) in patients with obesity and periodontitis (OP). The fixed effect model and Fisher's Z with 95% CI were applied.

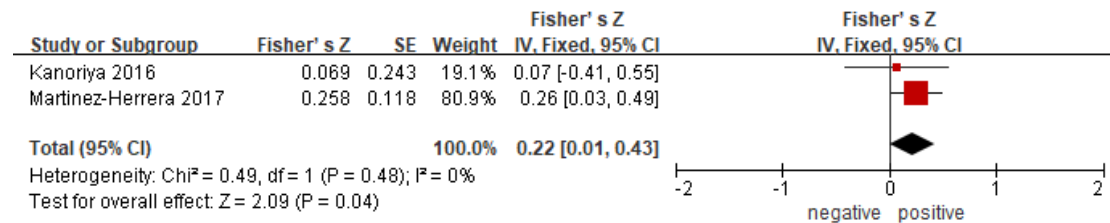

**Figure S3.** Subgroup analysis of the association of serum RBP4 levels with clinical attachment loss (CAL) in patients with obesity and periodontitis (OP). The fixed effect model and Fisher's Z with 95% CI were applied.

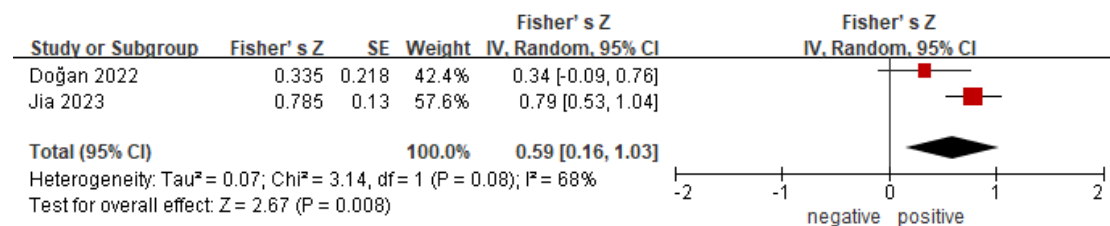

**Figure S4.** Subgroup analysis of the association of serum visfatin levels with probing depth (PD) in patients with obesity and periodontitis (OP). The random effect model and Fisher's Z with 95% CI were applied.

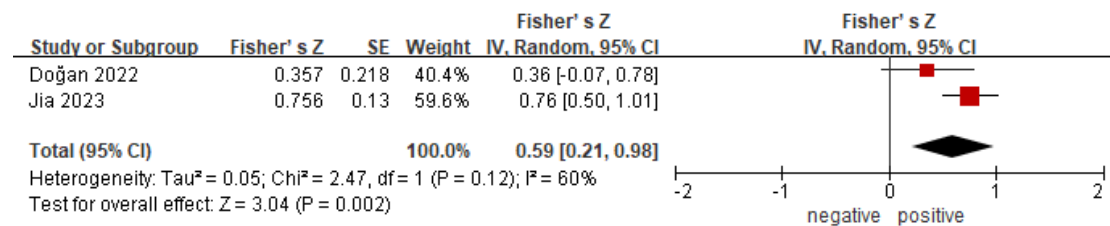

**Figure S5.** Subgroup analysis of the association of serum visfatin levels with clinical attachment loss (CAL) in patients with obesity and periodontitis (OP). The random effect model and Fisher's Z with 95% CI were applied.

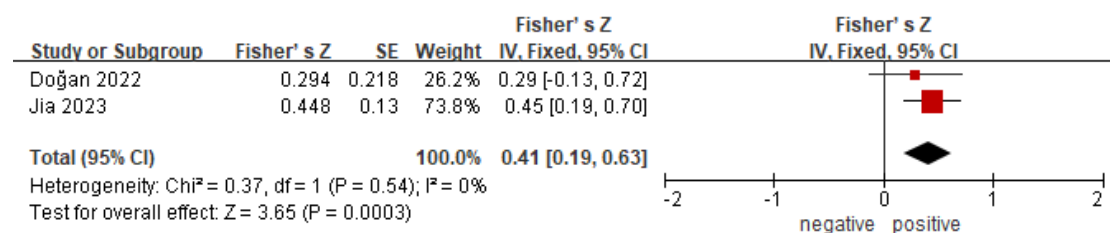

**Figure S6.** Subgroup analysis of the association of serum visfatin levels with visible periodontal plaque index (PI)

in patients with obesity and periodontitis (OP). The fixed effect model and Fisher's Z with 95% CI were applied.

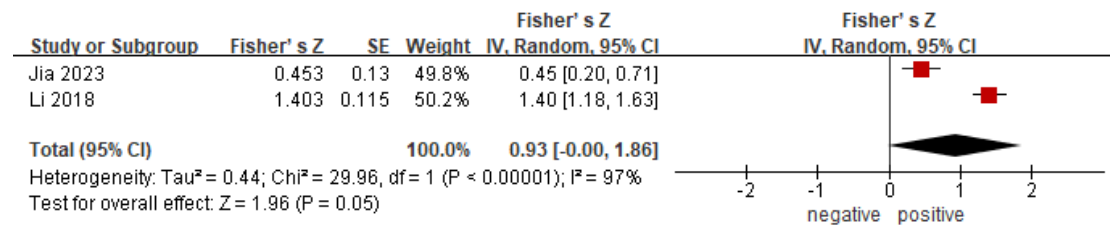

**Figure S7.** Subgroup analysis of the association of serum visfatin levels with total cholesterol (TC) levels in patients with obesity and periodontitis (OP). The random effect model and Fisher's Z with 95% CI were applied.

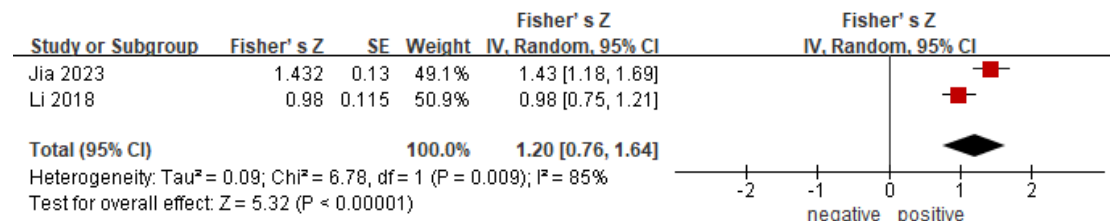

**Figure S8.** Subgroup analysis of the association of serum visfatin levels with triglycerides (TG) levels in patients with obesity and periodontitis (OP). The random effect model and Fisher's Z with 95% CI were applied.

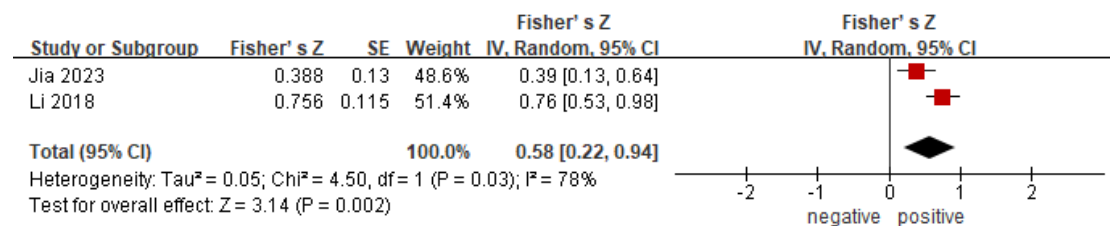

**Figure S9.** Subgroup analysis of the association of serum visfatin levels with fasting blood glucose (FBG) levels in patients with obesity and periodontitis (OP). The random effect model and Fisher's Z with 95% CI were applied.

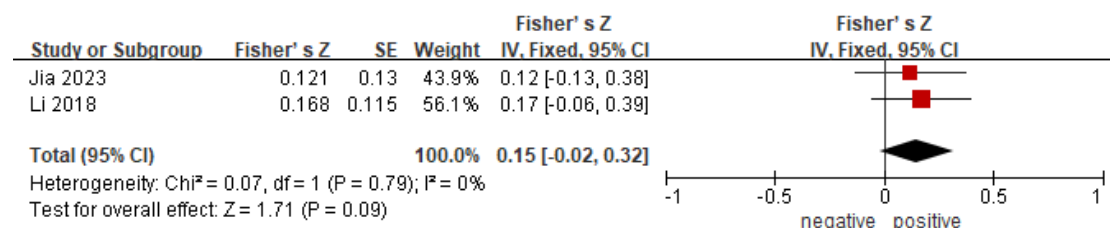

**Figure S10.** Subgroup analysis of the association of serum visfatin levels with glycosylated hemoglobin (HbA1c) levels in patients with obesity and periodontitis (OP). The fixed effect model and Fisher's Z with 95% CI were applied.

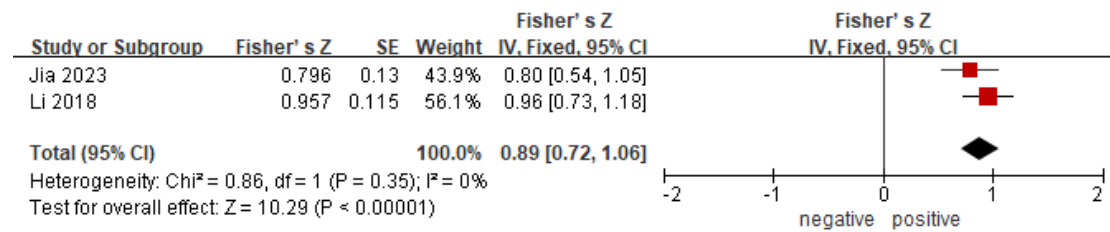

**Figure S11.** Subgroup analysis of the association of serum visfatin levels with low density lipoprotein cholesterol (LDL-C) levels in patients with obesity and periodontitis (OP). The fixed effect model and Fisher's Z with 95% CI were applied.

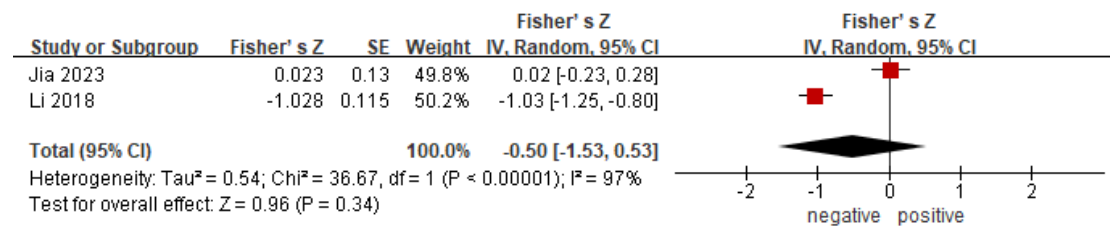

**Figure S12.** Subgroup analysis of the association of serum visfatin levels with high density lipoprotein cholesterol (HDL-C) levels in patients with obesity and periodontitis (OP). The fixed effect model and Fisher's Z with 95% CI were applied.

## References

1. Papapanou, P.N., M. Sanz, N. Buduneli, T. Dietrich, M. Feres, D.H. Fine, et al., *Periodontitis: Consensus report of workgroup 2 of the 2017 World Workshop on the Classification of Periodontal and Peri-Implant Diseases and Conditions*. J Periodontol, 2018. **89 Suppl 1**: p. S173-s182.
